Correction

## Correction: Analytical validation of NeXT Personal<sup>®</sup>, an ultra-sensitive personalized circulating tumor DNA assay

Josette Northcott<sup>1</sup>, Gabor Bartha<sup>1</sup>, Jason Harris<sup>1</sup>, Conan Li<sup>1</sup>, Fabio C.P. Navarro<sup>1</sup>, Rachel Marty Pyke<sup>1</sup>, Manqing Hong<sup>1</sup>, Qi Zhang<sup>1</sup>, Shuyuan Ma<sup>1</sup>, Tina X. Chen<sup>1</sup>, Janet Lai<sup>1</sup>, Nitin Udar<sup>1</sup>, Juan-Sebastian Saldivar<sup>1</sup>, Erin Ayash<sup>1</sup>, Joshua Anderson<sup>1</sup>, Jiang Li<sup>1</sup>, Tiange Cui<sup>1</sup>, Tu Le<sup>1</sup>, Ruthie Chow<sup>1</sup>, Randy Jerel Velasco<sup>1</sup>, Chris Mallo<sup>1</sup>, Rose Santiago<sup>1</sup>, Robert C. Bruce<sup>1</sup>, Laurie J. Goodman<sup>1</sup>, Yi Chen<sup>1</sup>, Dan Norton<sup>1</sup>, Richard O. Chen<sup>1,\*</sup> and John M. Lyle<sup>1,\*</sup>

<sup>1</sup>Personalis, Inc., Fremont, CA 94555, USA

\* Co-last authors

**Published:** June 20, 2024

**Copyright:** © 2024 Northcott et al. This is an open access article distributed under the terms of the [Creative Commons Attribution License](#) (CC BY 4.0), which permits unrestricted use, distribution, and reproduction in any medium, provided the original author and source are credited.

**This article has been corrected:** The author Massimo Morra has been added to the author list, following Nitin Udar. In addition, Josette Northcott and Gabor Bartha are now listed as co-first authors:

Josette Northcott<sup>1,\*</sup>, Gabor Bartha<sup>1,\*</sup>, Jason Harris<sup>1</sup>, Conan Li<sup>1</sup>, Fabio C.P. Navarro<sup>1</sup>, Rachel Marty Pyke<sup>1</sup>, Manqing Hong<sup>1</sup>, Qi Zhang<sup>1</sup>, Shuyuan Ma<sup>1</sup>, Tina X. Chen<sup>1</sup>, Janet Lai<sup>1</sup>, Nitin Udar<sup>1</sup>, Massimo Morra<sup>1</sup>, Juan-Sebastian Saldivar<sup>1</sup>, Erin Ayash<sup>1</sup>, Joshua Anderson<sup>1</sup>, Jiang Li<sup>1</sup>, Tiange Cui<sup>1</sup>, Tu Le<sup>1</sup>, Ruthie Chow<sup>1</sup>, Randy Jerel Velasco<sup>1</sup>, Chris Mallo<sup>1</sup>, Rose Santiago<sup>1</sup>, Robert C. Bruce<sup>1</sup>, Laurie J. Goodman<sup>1</sup>, Yi Chen<sup>1</sup>, Dan Norton<sup>1</sup>, Richard O. Chen<sup>1,#</sup> and John M. Lyle<sup>1,#</sup>

Massimo Morra

<sup>1</sup>Personalis, Inc., Fremont, CA 94555, USA

\* Co-first authors

# Co-last authors

In addition, a typo was corrected in Table 1. The value of the coefficient of variation has been changed from 10,000 to 1,000 PPM.

The authors declare that these corrections do not change the results or conclusions of this paper.

Original article: Oncotarget. 2024; 15:200–218. <https://doi.org/10.18632/oncotarget.28565>
